# Supplementary material for: Mechanistic insight into functionally different human islet polypeptide (hIAPP) amyloid: the intrinsic role of the C-terminal structural motifs
Source: Royal Society of Chemistry journal article supplement (doi:10.1039/d2cp01650h), 2022-01-01
Supplement: d2cp01650h1.pdf [file d2cp01650h1.pdf]

## Supplementary Information

### **Mechanistic Insight into Functionally Different Human Islet Polypeptide (hIAPP) amyloid: The Intrinsic Role of the C-terminal Structural Motifs**

Dibakar Sarkar,<sup>1</sup> Narayan Chandra Maity,<sup>2</sup> Gourav Shome,<sup>3</sup> Kyriakos Gabriel Varnava,<sup>4</sup> Vijayalekshmi Sarojini,<sup>4</sup> Subramanian Vivekanandan,<sup>5</sup> Nirakar Sahoo,<sup>6</sup> Sourav Kumar,<sup>1</sup> Atin Kumar Mandal,<sup>3</sup> Ranjit Biswas,<sup>2</sup> Anirban Bhunia<sup>1, \*</sup>

<sup>1</sup>Department of Biophysics, Bose Institute, EN 80, Sector V, Kolkata 700 091, India;

<sup>2</sup>Chemical, Biological and Macromolecular Sciences, S. N. Bose National Centre for Basic Sciences, Sector-III, Salt Lake, Kolkata-700106, India;

<sup>3</sup>School of Chemical Sciences, The University of Auckland, Private Bag 92019, Auckland, New Zealand;

<sup>4</sup>College of Pharmacy, University of Kentucky, Lexington, KY 40536-0596, USA;

<sup>5</sup>Department of Biology, University of Texas Rio Grande Valley, Edinburg, Texas, 78539, USA;

<sup>6</sup>Division of Molecular Medicine, Bose Institute, EN 80, Sector V, Kolkata 700 091, India;

Corresponding author: [bhunias@jbose.ac.in](mailto:bhunias@jbose.ac.in) or [anirbanbhunia@gmail.com](mailto:anirbanbhunia@gmail.com) (AB)

**Table S1.** Fitting parameters of ThT fluorescence kinetics at 37 °C, under shaking conditions (250 rpm).

| Peptide           | hIAPP               | VY21                 |
|-------------------|---------------------|----------------------|
| $T_{\text{half}}$ | $8.45 \pm 1.07$ min | $50.85 \pm 1.77$ min |
| $t_{\text{lag}}$  | Not determined      | $18.4 \pm 1.6$ min   |

**Table S2.** Fitting parameters of ThT fluorescence kinetics at 25 °C, under shaking conditions (250rpm).

| Peptide           | hIAPP                | VY21                   |
|-------------------|----------------------|------------------------|
| $T_{\text{half}}$ | $31.73 \pm 2.14$ min | $109.72 \pm 18.94$ min |
| $t_{\text{lag}}$  | $8.41 \pm 2.10$ min  | $61.78 \pm 18.54$ min  |

**Table S3.** Fitting parameters of time-resolve fluorescence lifetime magic angle (54.7°) decay of 20  $\mu\text{M}$  ThT with 80  $\mu\text{M}$  hIAPP at 25 °C, under non-shaking condition.

| Time/min | $a_1$ | $\tau_1/\text{ps}$ | $a_2$ | $\tau_2/\text{ps}$ | $a_3$ | $\tau_3/\text{ps}$ | $\langle\tau_{\text{life}}\rangle/\text{ps}$ |
|----------|-------|--------------------|-------|--------------------|-------|--------------------|----------------------------------------------|
| 0        | 0.99  | 5                  | 0.005 | 498                | 0.005 | 1851               | 17                                           |
| 10       | 0.99  | 5                  | 0.005 | 512                | 0.005 | 1907               | 17                                           |
| 20       | 0.99  | 5                  | 0.005 | 551                | 0.005 | 1973               | 18                                           |
| 30       | 0.99  | 5                  | 0.005 | 540                | 0.005 | 1970               | 18                                           |
| 40       | 0.99  | 5                  | 0.005 | 537                | 0.005 | 1968               | 18                                           |
| 50       | 0.99  | 5                  | 0.005 | 510                | 0.005 | 1973               | 17                                           |
| 60       | 0.99  | 5                  | 0.005 | 592                | 0.005 | 2058               | 18                                           |
| 70       | 0.99  | 5                  | 0.005 | 559                | 0.005 | 2044               | 18                                           |
| 80       | 0.99  | 5                  | 0.005 | 585                | 0.005 | 2055               | 18                                           |
| 90       | 0.99  | 5                  | 0.005 | 529                | 0.005 | 2034               | 18                                           |
| 100      | 0.98  | 5                  | 0.01  | 572                | 0.01  | 2050               | 31                                           |
| 110      | 0.98  | 6                  | 0.01  | 577                | 0.01  | 2072               | 32                                           |
| 120      | 0.98  | 6                  | 0.01  | 557                | 0.01  | 2042               | 32                                           |
| 130      | 0.98  | 6                  | 0.01  | 579                | 0.01  | 2068               | 32                                           |
| 140      | 0.98  | 6                  | 0.01  | 595                | 0.01  | 2080               | 33                                           |
| 150      | 0.98  | 6                  | 0.01  | 566                | 0.01  | 2077               | 32                                           |
| 160      | 0.98  | 6                  | 0.01  | 594                | 0.01  | 2077               | 33                                           |
| 170      | 0.98  | 6                  | 0.01  | 574                | 0.01  | 2063               | 32                                           |
| 180      | 0.98  | 6                  | 0.01  | 571                | 0.01  | 2042               | 32                                           |
| 190      | 0.98  | 7                  | 0.01  | 557                | 0.01  | 2017               | 33                                           |
| 200      | 0.90  | 14                 | 0.06  | 511                | 0.04  | 1951               | 121                                          |

|     |      |     |      |     |      |      |     |
|-----|------|-----|------|-----|------|------|-----|
| 210 | 0.88 | 14  | 0.07 | 503 | 0.05 | 1921 | 144 |
| 220 | 0.86 | 15  | 0.08 | 528 | 0.06 | 1929 | 171 |
| 230 | 0.85 | 14  | 0.09 | 515 | 0.06 | 1896 | 172 |
| 240 | 0.81 | 16  | 0.12 | 522 | 0.07 | 1889 | 208 |
| 250 | 0.70 | 24  | 0.19 | 527 | 0.11 | 1872 | 323 |
| 260 | 0.55 | 53  | 0.30 | 614 | 0.15 | 1925 | 502 |
| 270 | 0.50 | 60  | 0.34 | 612 | 0.16 | 1908 | 543 |
| 280 | 0.45 | 97  | 0.38 | 685 | 0.17 | 1961 | 637 |
| 290 | 0.42 | 108 | 0.40 | 697 | 0.18 | 1951 | 675 |
| 300 | 0.40 | 100 | 0.40 | 648 | 0.20 | 1887 | 677 |
| 310 | 0.40 | 109 | 0.41 | 673 | 0.19 | 1912 | 683 |
| 320 | 0.40 | 148 | 0.41 | 737 | 0.19 | 1972 | 736 |
| 330 | 0.41 | 188 | 0.42 | 810 | 0.17 | 2028 | 762 |
| 340 | 0.41 | 183 | 0.42 | 790 | 0.17 | 2007 | 742 |
| 350 | 0.44 | 224 | 0.42 | 907 | 0.14 | 2185 | 785 |
| 360 | 0.46 | 241 | 0.42 | 951 | 0.12 | 2217 | 776 |

**Table S4.** Fitting parameters of time-resolve fluorescence lifetime magic angle (54.7°) decay of 20  $\mu$ M ThT with 80  $\mu$ M VY21 at 25 °C, under non-shaking condition.

| Time/min | a <sub>1</sub> | $\tau_1$ /ps | a <sub>2</sub> | $\tau_2$ /ps | a <sub>3</sub> | $\tau_3$ /ps | $\langle\tau_{life}\rangle$ /ps |
|----------|----------------|--------------|----------------|--------------|----------------|--------------|---------------------------------|
| 0        | 0.61           | 42           | 0.31           | 398          | 0.08           | 1278         | 251                             |
| 10       | 0.57           | 49           | 0.35           | 408          | 0.08           | 1210         | 268                             |
| 20       | 0.54           | 57           | 0.37           | 410          | 0.09           | 1175         | 288                             |
| 30       | 0.52           | 59           | 0.39           | 402          | 0.09           | 1163         | 292                             |
| 40       | 0.52           | 53           | 0.39           | 389          | 0.09           | 1156         | 283                             |
| 50       | 0.51           | 53           | 0.39           | 381          | 0.10           | 1131         | 289                             |
| 60       | 0.49           | 55           | 0.41           | 387          | 0.10           | 1147         | 300                             |
| 70       | 0.49           | 58           | 0.41           | 376          | 0.10           | 1105         | 293                             |
| 80       | 0.51           | 75           | 0.39           | 420          | 0.10           | 1118         | 313                             |
| 90       | 0.54           | 78           | 0.36           | 417          | 0.10           | 1127         | 305                             |
| 100      | 0.47           | 79           | 0.43           | 432          | 0.10           | 1221         | 345                             |
| 110      | 0.46           | 75           | 0.43           | 410          | 0.11           | 1182         | 341                             |
| 120      | 0.46           | 82           | 0.43           | 414          | 0.11           | 1187         | 346                             |
| 140      | 0.46           | 81           | 0.43           | 404          | 0.11           | 1160         | 339                             |

|     |      |    |      |     |      |      |     |
|-----|------|----|------|-----|------|------|-----|
| 160 | 0.46 | 77 | 0.43 | 412 | 0.11 | 1164 | 341 |
| 180 | 0.45 | 77 | 0.44 | 397 | 0.11 | 1155 | 337 |
| 210 | 0.46 | 78 | 0.43 | 411 | 0.11 | 1167 | 341 |
| 240 | 0.45 | 72 | 0.44 | 389 | 0.11 | 1132 | 328 |
| 270 | 0.45 | 86 | 0.44 | 407 | 0.11 | 1147 | 344 |
| 300 | 0.45 | 84 | 0.44 | 397 | 0.11 | 1140 | 338 |
| 330 | 0.45 | 85 | 0.44 | 405 | 0.11 | 1153 | 343 |
| 360 | 0.45 | 83 | 0.44 | 402 | 0.11 | 1138 | 339 |

**Table S5.** Fitting parameters of time-resolve fluorescence lifetime magic angle (54.7°) decay of 20  $\mu$ M ThT with 80  $\mu$ M of both hIAPP and VY21 (1:1 molar ratio) at 25 °C, under non-shaking condition.

| Time/min | a <sub>1</sub> | $\tau_1$ /ps | a <sub>2</sub> | $\tau_2$ /ps | a <sub>3</sub> | $\tau_3$ /ps | $\langle\tau_{life}\rangle$ /ps |
|----------|----------------|--------------|----------------|--------------|----------------|--------------|---------------------------------|
| 0        | 0.94           | 10           | 0.04           | 565          | 0.02           | 2038         | 73                              |
| 10       | 0.91           | 13           | 0.05           | 581          | 0.04           | 1995         | 121                             |
| 20       | 0.90           | 15           | 0.05           | 582          | 0.05           | 1975         | 141                             |
| 30       | 0.89           | 16           | 0.06           | 625          | 0.05           | 2005         | 152                             |
| 40       | 0.85           | 17           | 0.09           | 574          | 0.06           | 1958         | 184                             |
| 50       | 0.85           | 18           | 0.09           | 608          | 0.06           | 1989         | 189                             |
| 60       | 0.83           | 20           | 0.10           | 591          | 0.07           | 1956         | 213                             |
| 70       | 0.81           | 21           | 0.11           | 612          | 0.08           | 1982         | 243                             |
| 80       | 0.80           | 23           | 0.12           | 615          | 0.08           | 1968         | 250                             |
| 90       | 0.77           | 26           | 0.14           | 616          | 0.09           | 1974         | 284                             |
| 100      | 0.75           | 27           | 0.15           | 624          | 0.10           | 1979         | 312                             |
| 110      | 0.74           | 28           | 0.16           | 606          | 0.10           | 1954         | 313                             |
| 120      | 0.72           | 30           | 0.18           | 620          | 0.10           | 1963         | 329                             |
| 130      | 0.68           | 35           | 0.20           | 694          | 0.12           | 1969         | 399                             |
| 140      | 0.66           | 36           | 0.21           | 634          | 0.13           | 1917         | 406                             |
| 150      | 0.64           | 37           | 0.23           | 613          | 0.13           | 1894         | 411                             |
| 160      | 0.63           | 38           | 0.24           | 607          | 0.13           | 1890         | 415                             |
| 170      | 0.60           | 46           | 0.26           | 643          | 0.14           | 1905         | 461                             |
| 180      | 0.59           | 45           | 0.26           | 628          | 0.15           | 1890         | 473                             |
| 190      | 0.58           | 48           | 0.27           | 639          | 0.15           | 1909         | 487                             |
| 200      | 0.55           | 50           | 0.30           | 644          | 0.15           | 1911         | 507                             |
| 210      | 0.54           | 58           | 0.31           | 659          | 0.15           | 1909         | 522                             |

|     |      |    |      |     |      |      |     |
|-----|------|----|------|-----|------|------|-----|
| 220 | 0.53 | 60 | 0.31 | 670 | 0.16 | 1924 | 547 |
| 230 | 0.52 | 63 | 0.32 | 673 | 0.16 | 1925 | 556 |
| 240 | 0.51 | 60 | 0.32 | 649 | 0.17 | 1895 | 560 |
| 250 | 0.52 | 65 | 0.32 | 691 | 0.16 | 1935 | 564 |
| 260 | 0.50 | 68 | 0.33 | 669 | 0.17 | 1900 | 577 |
| 270 | 0.50 | 68 | 0.33 | 669 | 0.17 | 1898 | 577 |
| 280 | 0.49 | 70 | 0.34 | 695 | 0.17 | 1926 | 598 |
| 290 | 0.49 | 68 | 0.34 | 674 | 0.17 | 1898 | 585 |
| 300 | 0.49 | 67 | 0.34 | 673 | 0.17 | 1903 | 585 |
| 330 | 0.48 | 70 | 0.35 | 672 | 0.17 | 1887 | 590 |
| 360 | 0.48 | 72 | 0.36 | 706 | 0.16 | 1924 | 597 |

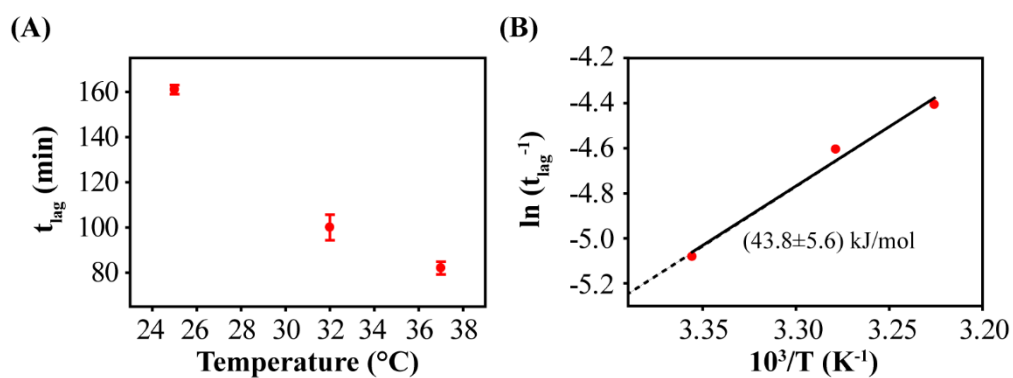

**Figure S1.** (A) Aggregation lag time ( $t_{lag}$ ) of hIAPP under non-shaking conditions plotted as a function of aggregation reaction temperature. (B) Arrhenius plot of initial elongation rate vs. inverse temperature for 80  $\mu$ M hIAPP samples. The activation energy calculated from the well fitted ( $R = 0.99$ ) data was  $43.8 \pm 5.6$  kJ/mol.

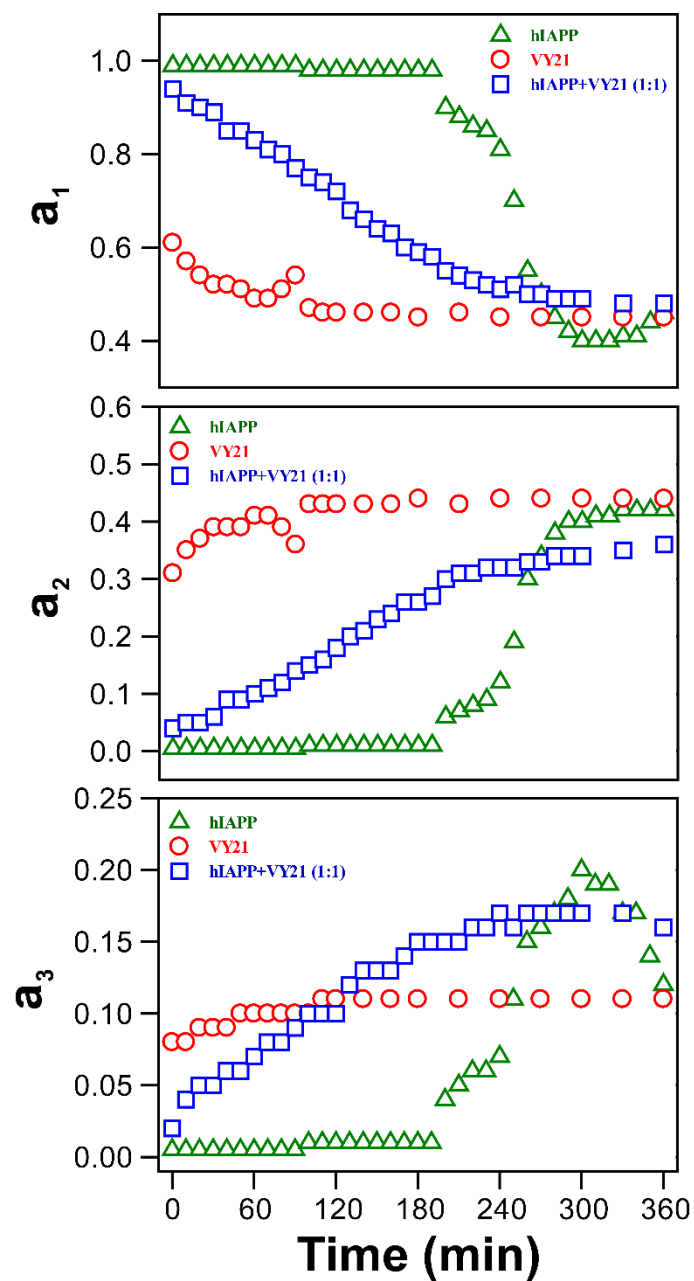

**Figure S2.** Stoichiometry of respective time scale in time-resolved fluorescence average lifetime of ThT with hIAPP, VY21, 1:1 mixture of hIAPP and VY21 (80  $\mu$ M) in phosphate buffer (20  $\mu$ M) solution up to 360 min at 25°C, under non-shaking conditions. All representations are color-coded.

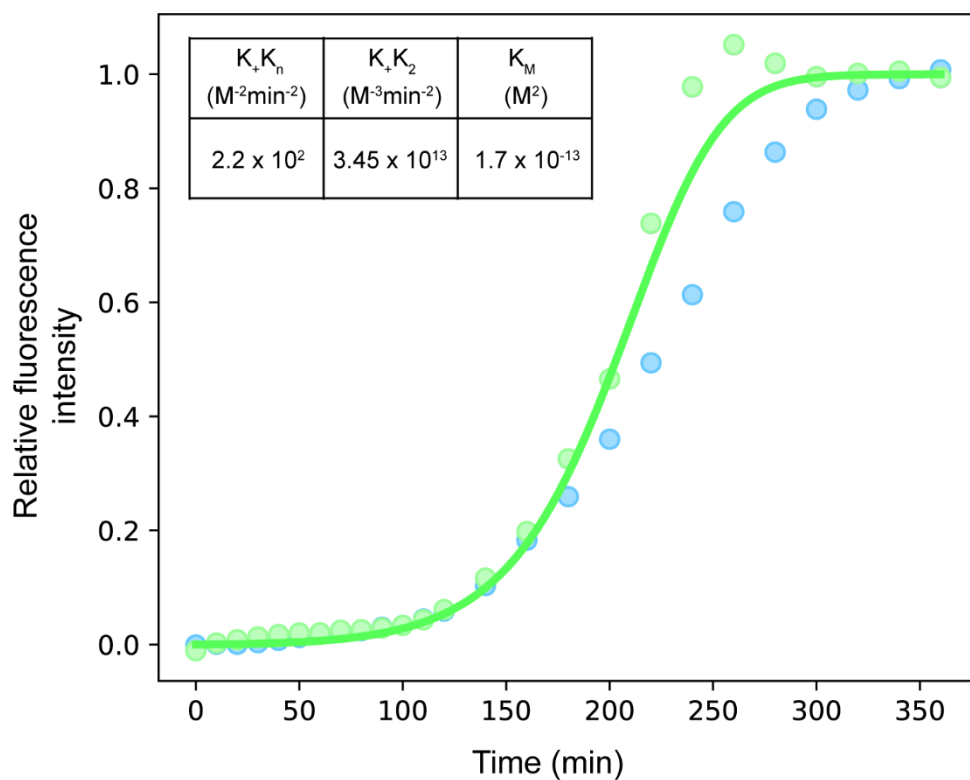

**Figure S3.** Fitting of ThT fluorescence curve of hIAPP at 25 °C under non-shaking conditions using the online platform Amylofit. Inset table shows the combined rate constant for secondary nucleation,  $k_+k_2$ , the combined rate constant for primary nucleation,  $k_+k_n$ , and the Michaelis constant,  $K_M$ , calculated from the fitting.

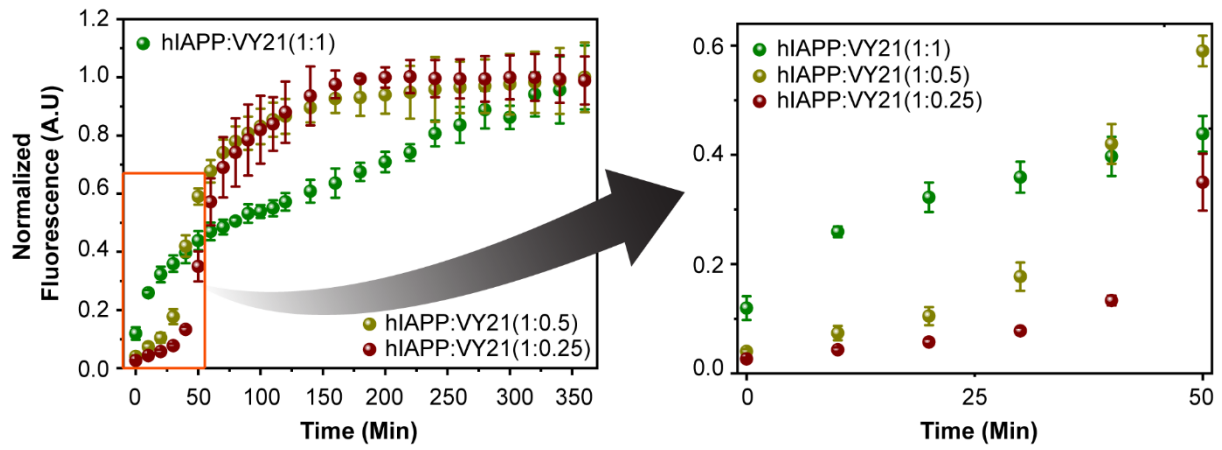

**Figure S4.** ThT fluorescence assay of hIAPP co-incubated with different ratios of VY21. Inset shows the aggregation kinetics of individual samples at the initial phase. With decreasing concentration of VY21, an increase in the lag-time was apparent.



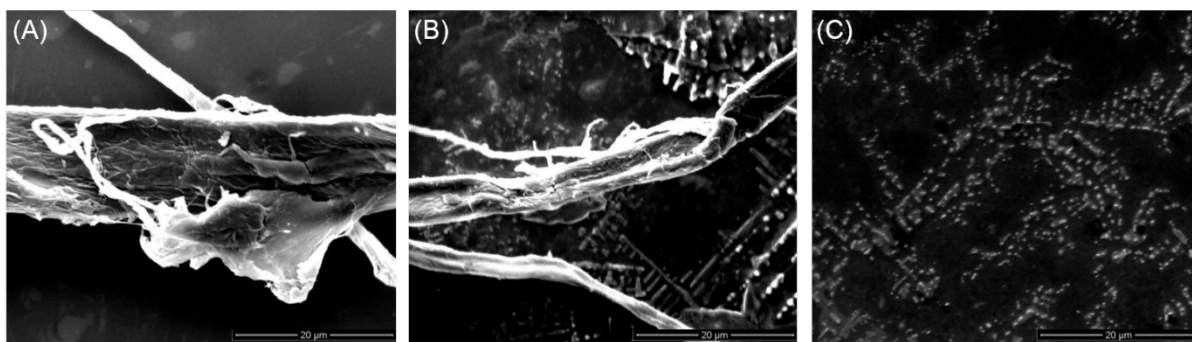

**Figure S5.** SEM images of (A) hIAPP, (B) hIAPP co-incubated with VY21 at a 1:1 molar ratio, and (C) VY21 aggregates at 25 °C, under non-shaking conditions.
